# Supplementary material
Source: PubMed Central journal article supplement (PMC373505)

Pax 7

desmin

secondary

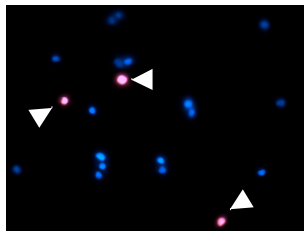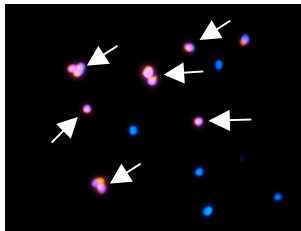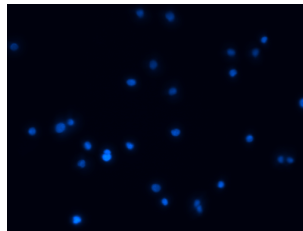

MP

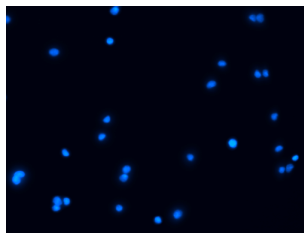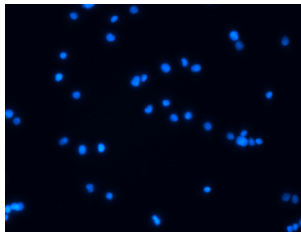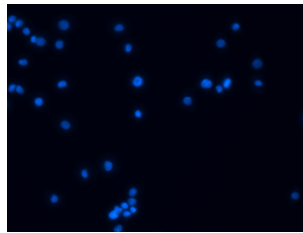

SP

Supplement: pnas_0400373101_3.pdf [file pnas_0400373101_3.pdf]
